## RESEARCH ARTICLE

# Pebble/ECT2 RhoGEF negatively regulates the Wingless/Wnt signaling pathway

Elisabeth R. Greer, Anna T. Chao and Amy Bejsovec\*

## ABSTRACT

Wingless (Wg)/Wnt signaling is essential for patterning invertebrate and vertebrate embryos, and inappropriate Wnt activity is associated with a variety of human cancers. Despite intensive study, Wnt pathway mechanisms are not fully understood. We have discovered a new mechanism for regulating the Wnt pathway: activity of a Rho guanine nucleotide exchange factor (GEF) encoded by *pebble* (*pbl*) in *Drosophila* and *ECT2* in humans. This RhoGEF has an essential role in cytokinesis, but also plays an unexpected, conserved role in inhibiting Wg/Wnt activity. Loss and gain of *pbl* function in *Drosophila* embryos cause pattern defects that indicate altered Wg activity. Both Pbl and ECT2 repress Wg/Wnt target gene expression in cultured *Drosophila* and human cells. The GEF activity is required for Wnt regulation, whereas other protein domains important for cytokinesis are not. Unlike most negative regulators of Wnt activity, Pbl/ECT2 functions downstream of Armadillo (Arm)/beta-catenin stabilization. Our results indicate GTPase regulation at a novel point in Wg/Wnt signal transduction, and provide new insight into the categorization of *ECT2* as a human proto-oncogene.

**KEY WORDS:** Wingless/Wnt signaling, Pebble/ECT2, RhoGEF

## INTRODUCTION

The Wnt family of secreted growth factors is highly conserved in metazoan animals, playing crucial roles in development, cell proliferation and tissue homeostasis (reviewed by MacDonald et al., 2009). Wnt signaling generates embryonic pattern in many tissue types from epidermal epithelia to the nervous system. In mature animals, Wnts maintain stem cell populations in a variety of tissues, including blood, bone, hair follicles and gut (reviewed by Clevers, 2006). Mutations that result in excess Wnt signaling are associated with a number of human cancers especially colorectal cancer (Polakis, 2007). The diverse and widespread function of Wnts highlights the importance of understanding the mechanism of Wnt signal transduction. We use *Drosophila* as a model system for studying Wnt signaling, because its powerful genetics allows the discovery of new pathway components.

Wnt signaling is easily assayed by examining the highly Wnt-sensitive cuticle pattern of the *Drosophila* embryo. At the end of embryogenesis, epidermal cells secrete a layer of cuticle with a stereotyped segmental pattern consisting of an array of hooked elements, called denticles, interspersed with naked cuticle. The *wingless* (*wg*) gene, which encodes the primary fly Wnt, is expressed in a single row of epidermal cells in each segment and generates positional information across the segment (reviewed by

Bejsovec, 2006). Loss-of-function *wg* mutations result in a uniform lawn of denticles at the expense of naked cuticle (Nüsslein-Volhard et al., 1984; Nüsslein-Volhard et al., 1985), whereas high levels of Wg signaling lead to excess naked cuticle and loss of denticles (Noordermeer et al., 1992). Epistasis experiments from many laboratories have used these phenotypes to identify genes required for proper Wg signaling. The signaling components identified in *Drosophila* are conserved with vertebrates, and so this body of work has led to the following general model for Wg/Wnt signaling. In the absence of Wg/Wnt signaling, Axin, Apc, Casein kinase 1 and Zeste-white3 (*Zw3*; also known as Shaggy, *Sgg*)/glycogen synthase kinase 3 $\beta$  (GSK) form the destruction complex, which phosphorylates Armadillo/beta-catenin (Arm/beta-cat) and targets it for degradation. Wg/Wnt binds to a receptor complex of Frizzled (*Fz*) and Arrow (*Arr*)/LRP5/6, which inactivates the destruction complex and stabilizes Arm/beta-cat. Arm/beta-cat then enters the nucleus where it displaces a transcriptional co-repressor, Groucho (*Gro*), from the transcription factor Tcf (Pan in *Drosophila*). This converts Tcf from a transcriptional repressor to a transcriptional activator as Arm recruits Legless (*Lgs*)/BCL9 and Pygopus (*Pygo*), leading to transcription of Wg target genes (reviewed by Bejsovec, 2006; Clevers, 2006).

Additional negative regulators of the Wg pathway have been identified in genetic screens using *Drosophila* cuticle pattern as an assay system. Some showed pleiotropic phenotypes that had prevented them from being connected with the Wg/Wnt pathway prior to these screens. For example, the RacGTPase Activating Protein Tumbleweed (*Tum*) and the kinesin-like protein Pavarotti (*Pav*) have essential roles in cytokinesis (Somers and Saint, 2003), but also can downregulate the Wg/Wnt pathway (Jones and Bejsovec, 2005; Jones et al., 2010). In their cytokinesis role, they interact with Pebble (*Pbl*), a Rho guanine nucleotide exchange factor (RhoGEF), to form the centralspindlin complex. This complex is essential for positioning the actin contractile ring during cell division (Prokopenko et al., 1999; Somers and Saint, 2003). The maternal contributions of *tum*, *pav* or *pbl* gene product allow zygotically mutant embryonic cells to divide normally until mitotic cycle 14, after which division fails and binucleate cells accumulate in each mutant (Adams et al., 1998; Prokopenko et al., 1999; Zavortink et al., 2005). *Pbl* plays an additional role in regulating mesodermal spreading in *Drosophila* embryos, and so *pbl* mutant embryos also show gastrulation defects (Schumacher et al., 2004; Smallhorn et al., 2004). The human homolog of *Pbl*, *ECT2*, is likewise essential for cytokinesis and has additional roles in cell polarity and oncogenesis (Tatsumoto et al., 1999; Fields and Justilien, 2010). Epithelial cell transforming sequence 2 (*ECT2*) was designated a proto-oncogene based on the transforming capacity of truncated forms that lack the N-terminus or the nuclear localization signal (Miki et al., 1993; Saito et al., 2004). Full-length *ECT2* does not show transforming potential in cultured cells, but it is overexpressed in a number of human cancers (Saito et al., 2004; Hirata et al., 2009; Justilien and

Department of Biology, Duke University, Durham, NC 27708-0338, USA.

\*Author for correspondence (bejsovec@duke.edu)

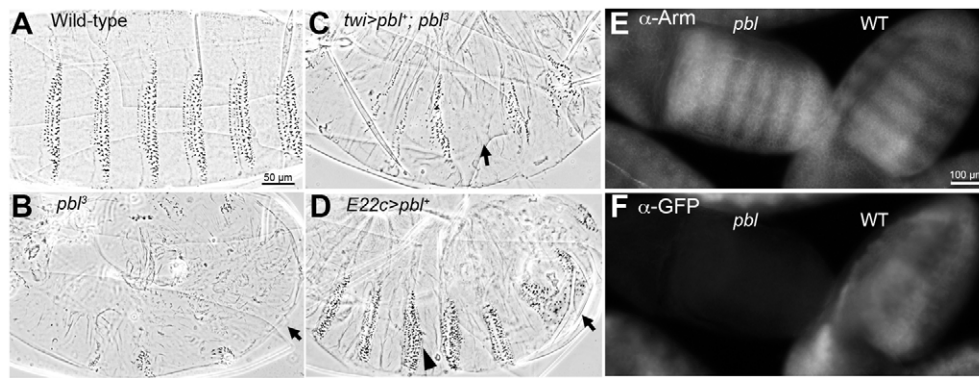

**Fig. 1. *pbl* mutant embryos show defects consistent with Wg pathway regulation.** (A) Wild-type embryos secrete a ventral cuticle pattern with naked cuticle separating eight abdominal denticle belts. Abdominal segments 2-7 are shown here. (B) Homozygous *pbl*<sup>3</sup> zygotic mutants showed severe gastrulation defects, with reduced denticle belts (arrow). (C) Rescuing mesodermal defects by driving *UAS-pbl* with *twist(twi)-Gal4* provided a better view of the epidermal pattern: *pbl*<sup>3</sup> mutants showed a reduced number of denticle belts (arrow) as well as a reduced number of denticle rows per belt compared with wild type. (D) Driving ubiquitous epidermal *UAS-pbl* expression with *E22c-Gal4* resulted in an expansion of denticle belts, replacing naked cuticle (arrowhead), as well as in head and dorsal closure defects. In addition, 40.2% of the embryos showed denticle belt fusions due to complete loss of naked cuticle in the affected segment (arrow). (E) Arm antibody staining in *pbl*<sup>3</sup> mutants showed normal striping (left), with slightly higher intensity of fluorescence in mutants than in wild-type siblings (right) stained under identical conditions ( $n > 100$ ). (F) GFP staining revealed presence of the *twi >GFP*-marked balancer. Anterior is to the left in all panels.

Fields, 2009). This has led to debate about whether *ECT2* overexpression contributes to or is a consequence of oncogenic transformation.

Because Tum and Pav downregulate Wg/Wnt activity, we tested whether their binding partner, Pbl, and its human homolog ECT2, also affect the Wg/Wnt pathway. Previous work in *Drosophila* hinted that Pbl might influence Wg-mediated patterning. Mutations in *pbl* were isolated in a genetic screen for mutations that disrupt cuticle pattern (Jürgens et al., 1984), but the epidermal defect was not characterized further. In addition, a deletion that removes *pbl*, as well as several other genes, was identified as an enhancer of *arm* gain-of-function phenotypes in the wing (Greaves et al., 1999). Here, we show that Pbl inhibits Wg signaling in *Drosophila* embryos and that both Pbl and ECT2 repress Wg/Wnt target gene expression in *Drosophila* and mammalian cells in culture.

## RESULTS

### Pbl is a negative regulator of Wg signaling

Loss-of-function *pbl* mutants die at the end of embryogenesis, with epidermal pattern defects that suggest a de-regulation of Wg signaling. Zygotic *pbl*<sup>3</sup> mutants show pleiotropic effects on mesoderm development that disrupt gastrulation; these defects complicate the analysis of mutant cuticle pattern. However, we found that the ventral cuticle of *pbl* mutants consistently showed replacement of denticles with ectopic naked cuticle, compared with wild type (Fig. 1A,B). This epidermal phenotype was seen more clearly when the gastrulation defects were rescued. We used a *twist-Gal4* driver to provide wild-type *pbl* in the mesoderm, causing less

distortion to the mutant cuticle and a better view of its excess naked cuticle specification (Fig. 1C), which is diagnostic of Wg hyperactivity (Noordermeer et al., 1992). We also examined molecular markers of Wg signaling in *pbl* mutants. Although we did not see significant changes in expression of the Wg target genes *engrailed (en)* or *wg* itself (not shown), we did detect a very slight elevation of Arm protein levels in the normal striped pattern of Arm accumulation (Fig. 1E, compare with wild-type sibling to right, marked with GFP balancer chromosome in 1F). Because Arm is stabilized by Wg signaling, any increase in Arm levels also would be consistent with Wg hyperactivity.

We next tested whether *pbl* gain of function would produce the opposite effect on epidermal patterning. We used the *E22c-Gal4* driver to express full-length *pbl* ubiquitously in embryonic epidermis. This overexpression resulted in 100% embryonic lethality ( $n=385$ ), with 40.2% of the embryos showing some loss of naked cuticle that normally separates the denticle belts (Fig. 1D; Table 1). As naked cuticle reflects Wg signaling activity in epidermal cells, its loss suggests antagonism of signaling. In addition, overexpressing *pbl* in the epidermis caused other developmental defects, such as missing head structures, failure to retract the germ band, and incomplete dorsal closure (Fig. 1D). We also found that overexpressing *pbl* in the epidermis slightly reduced Arm protein levels. This was most easily visualized by driving transgene expression in alternate segments with *prd-Gal4*, leaving even-numbered abdominal segments unaffected. Driving *UAS-GFP* in the *prd* domain had no effect on Arm stripes (Fig. 2A,B), whereas driving *UAS-pbl* diminishes Arm antibody staining in the *prd*-

**Table 1. Phenotypes of Pbl overexpression in embryonic epidermis**

| Transgene overexpressed with <i>E22c-Gal4</i>   | Percentage of embryos with belt fusion | Percentage lethality | Number of embryos |
|-------------------------------------------------|----------------------------------------|----------------------|-------------------|
| <i>UAS-pbl</i>                                  | 40.2                                   | 100                  | 385               |
| <i>UAS-pbl</i> Δ <i>BRCT1&amp;2</i>             | 40.6                                   | 95.7                 | 352               |
| <i>UAS-pbl</i> Δ <i>DH-PH</i>                   | 49.0                                   | 57.3                 | 363               |
| <i>UAS-pbl</i> Δ <i>N-term</i>                  | N/A                                    | 100                  | 271               |
| <i>UAS-pbl</i> Δ <i>NLS</i>                     | N/A                                    | 100                  | 529               |
| <i>UAS-pbl</i> <sup>V531D</sup>                 | 0                                      | 0.3                  | 633               |
| <i>UAS-pbl</i> Δ <i>DH-PH</i> <sup>V531D</sup>  | 0                                      | 1.4                  | 271               |
| <i>UAS-pbl</i> Δ <i>N-term</i> <sup>V531D</sup> | 0                                      | 0.9                  | 221               |

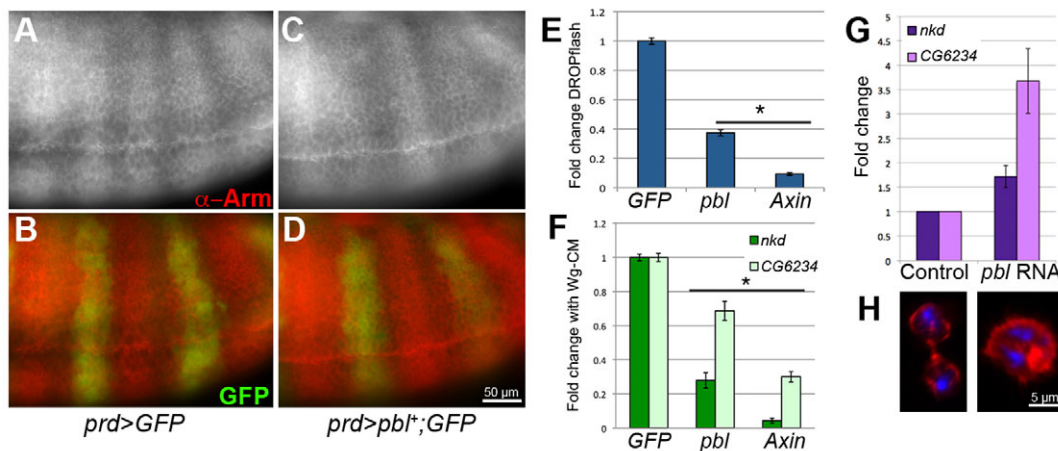

**Fig. 2. Pbl acts to repress Wg pathway activity in embryos and cultured cells.** (A,B) Normal Arm stripes were not altered by *prd-Gal4*-driven expression of *UAS-GFP*. B shows merged signals: Arm in red, GFP in green. (C,D) *prd-Gal4* driving *UAS-pbl* diminished Arm accumulation in the *prd* domain, marked by co-expression with *UAS-GFP* (D shows merge). (E) S2R+ cells activate DROPflash reporter in response to Wg-CM. This was unaffected by addition of *GFP* control DNA. Addition of *pbl* or *Axin*, a component of the destruction complex, repressed DROPflash activation to 37% and 9% of GFP control, respectively ( $*P<0.001$ ). (F) qPCR showed that *pbl* repressed activation of the endogenous Wg target genes *nkd* and *CG6234* to 28% and 68%, respectively, compared with control GFP. The *Axin* positive control repressed *nkd* and *CG6234* to 4% and 30%, respectively ( $*P<0.001$ ). (G) Conversely, knocking down *pbl* with RNAi elevated expression of both *nkd* and *CG6234*. (H) *pbl* RNAi resulted in accumulation of multinucleate cells (right) due to defects in cytokinesis, whereas mock RNAi-treated cells continued to divide normally (left). Rhodamine phalloidin stains actin (red), DAPI stains DNA (blue). Error bars represent s.e.m.

expressing cells (Fig. 2C,D). Thus, in embryos, both loss- and gain-of-function *pbl* phenotypes are consistent with a role for wild-type Pbl in negatively regulating Wg signaling.

We also observed a negative regulatory effect on cells in culture. We used the DROPflash reporter to monitor pathway activity in Wg-responsive *Drosophila* S2R+ cells (Yanagawa et al., 1998). DROPflash contains six tandem TCF binding sites that drive luciferase expression when the Wg pathway is activated (Li et al., 2007). We treated S2R+ cells with Wingless-conditioned media (Wg-CM), and found that overexpressing *pbl* reduced DROPflash activity to 37% of control levels ( $P<0.001$ ; Fig. 2E). We compared this to the effect of *Axin*, which is a known negative regulator of the Wg pathway. As expected, *Axin* expression repressed Wg-CM induction of DROPflash to 9% of control levels ( $P<0.001$ ; Fig. 2E). Thus, excess Pbl downregulates Wg reporter activity in cultured fly cells, but does not do so as strongly as overexpression of a destruction complex protein.

Ectopic Pbl also inhibited the expression of endogenous genes in S2R+ cells. The Wg target genes *nkd* and *CG6234* are transcriptionally activated by addition of Wg-CM (Fang et al., 2006). We quantified their expression levels in Wg-CM-induced cells by real-time PCR, and found that overexpressing *pbl* reduced *nkd* and *CG6234* expression to 28% and 68% of control levels, respectively ( $P<0.001$ ; Fig. 2F). As expected, overexpression of *Axin* repressed *nkd* and *CG6234* to 4% and 30% of control levels, respectively ( $P<0.001$ ; Fig. 2F). Moreover, knocking down *pbl* gene function, using RNA interference (RNAi), produced the opposite effect of overexpressing it. We treated cells with *pbl* double-stranded RNA and found that expression of both target genes was elevated above control levels (Fig. 2G), as they are when cultured cells are treated with *Axin* RNAi (Blauwkamp et al., 2008). Although overexpression of *pbl* did not disrupt cell division (not shown), knocking it down with RNAi did: treated cultures accumulated multinucleate cells whereas control-treated cultures continued to divide normally (Fig. 2H). Thus, native promoters of Wg target genes are responsive to Pbl repression *in vitro*, independently of its effect on cell division.

### Pbl requires GEF domain activity to regulate Wg signaling

Pbl is a complex protein with multiple protein-binding motifs in addition to its GEF domain (Fig. 3A). A series of mutated or truncated *Pbl* cDNA clones were constructed and used to determine which domains were important for cytokinesis, mesodermal spreading and subcellular protein localization (Smallhorn et al., 2004; van Impel et al., 2009). We tested a similar series of mutated Pbl constructs in S2R+ cells to determine which domains of Pbl are important for Wg regulation, assaying both DROPflash reporter activity and expression of endogenous genes (Fig. 3C,D). The N-terminus contains two BRCT protein-protein interaction domains, which are necessary for cytokinesis, but are not essential for mesodermal spreading (Somers and Saint, 2003; Smallhorn et al., 2004; van Impel et al., 2009). Tum physically interacts with the first BRCT domain of Pbl (Somers and Saint, 2003). We found that expression of *pblΔBRCT1* or *pblΔBRCT1&2* repressed DROPflash significantly compared with control values ( $P<0.001$ ; Fig. 3C). Indeed, these constructs consistently repressed DROPflash more strongly than did full-length Pbl. *pblΔBRCT1* or *pblΔBRCT1&2* also significantly repressed expression of *nkd* and *CG6234* ( $P<0.001$ ; Fig. 3D). Thus, the BRCT domains that are required for cytokinesis and for Tum binding are not necessary for Pbl repression of Wg signaling.

The central region of Pbl contains a nuclear localization sequence (NLS) and a PEST degradation sequence (Fig. 3A). A construct that lacks this region, *pblΔN-term*, localized constitutively to the cytosol, disrupting cytokinesis and mesoderm invagination (van Impel et al., 2009). Because Tum and Pav require functional NLSs to act as negative regulators of Wnt signaling (Jones et al., 2010), we investigated whether nuclear localization was important for Pbl function. Mutating the NLS (*pblΔNLS*) or deleting the N-terminus (*pblΔN-term* and *pblΔDH-PH*) prevented these proteins from localizing to the nucleus (van Impel et al., 2009). These forms of Pbl, however, were still able to repress DROPflash and endogenous Wg target genes (Fig. 3C,D). Although expression of *pblΔN-term* in embryos led to multi-nucleated cells, we did not observe this phenotype during the time course of our cell culture experiments



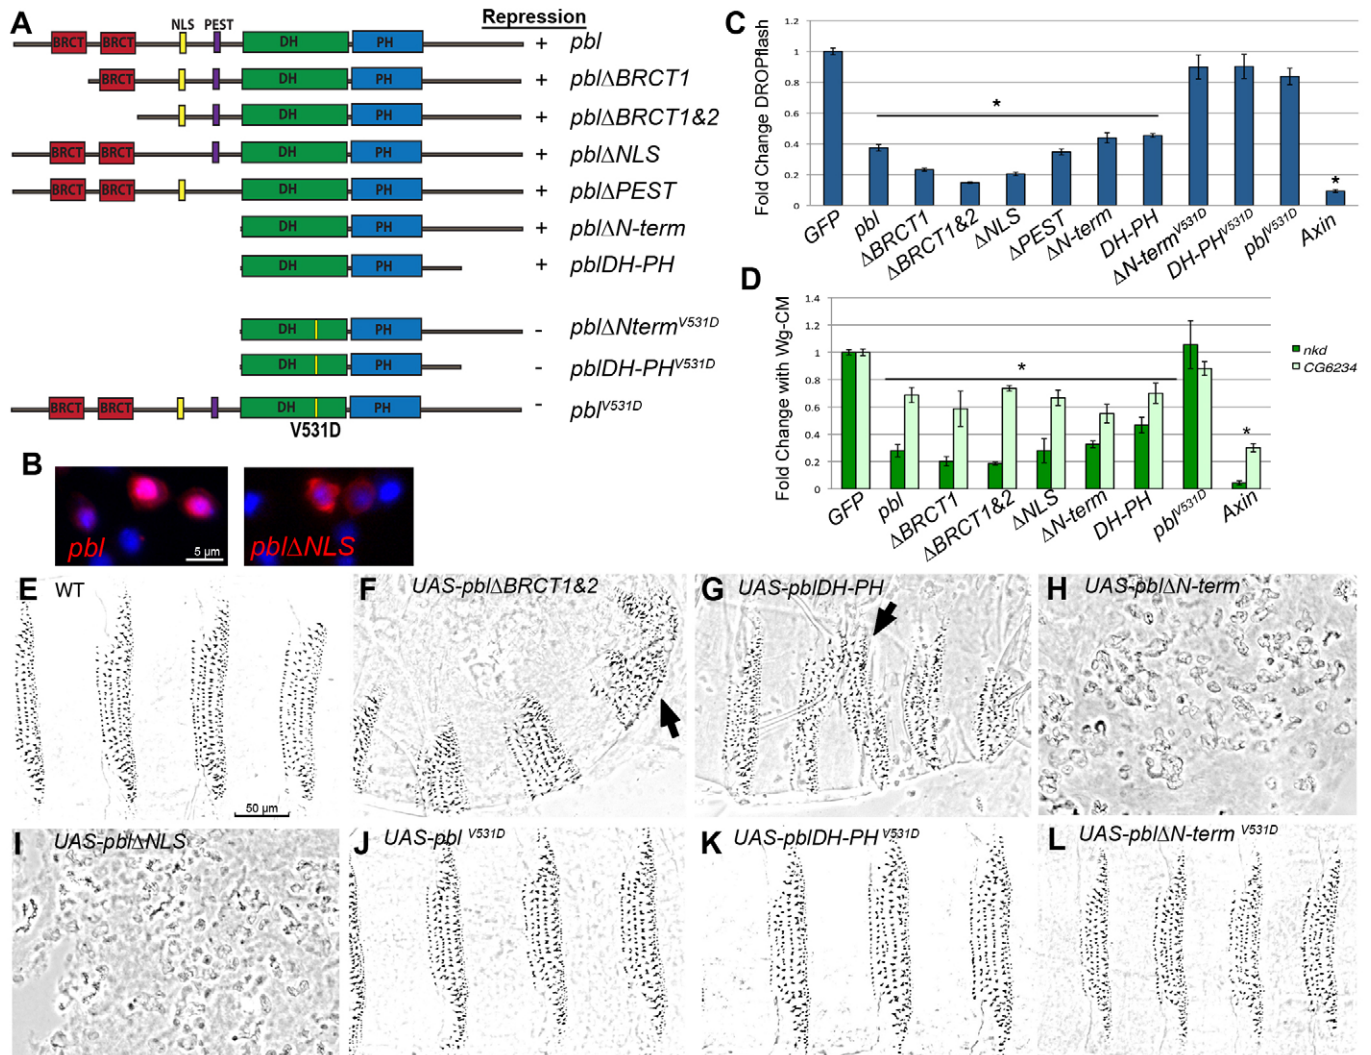

**Fig. 3. Pbl requires GEF activity to regulate Wg signaling.** (A) Protein domains of full-length and mutated forms of Pbl. Domains indicated from N to C terminus are BRCT (BRCA1 C-terminal domain), NLS (nuclear localization sequence), PEST (rich in proline, glutamic acid, serine, and threonine), DH (Dbl homology) and PH (pleckstrin homology). Yellow line marks the position of the V531D mutation, which disrupts the GEF domain. (B) Mutating the NLS of Pbl prevented localization to the nucleus (right panel) compared with wild-type hemagglutinin (HA)-tagged Pbl (left panel). Overlap of anti-HA (red) and DAPI (blue) appears bright pink. (C) In S2R+ cells induced with Wg-CM, DROpphase reporter activity was inhibited by *pbl* $\Delta$ BRCT1, *pbl* $\Delta$ BRCT1&2, *pbl* $\Delta$ NLS, *pbl* $\Delta$ PEST, *pbl* $\Delta$ N-term, *pbl*DH-PH or Axin compared with GFP control (\**P*<0.001). Disrupting the GEF domain (*pbl* $\Delta$ N-term<sup>V531D</sup>, *pbl*DH-PH<sup>V531D</sup> and *pbl*<sup>V531D</sup>) abolished this repression. (D) Wg-induced expression of *nkd* and *CG6234* was repressed by *pbl* $\Delta$ BRCT1, *pbl* $\Delta$ BRCT1&2, *pbl* $\Delta$ NLS, *pbl* $\Delta$ N-term, *pbl*DH-PH or the Axin positive control (\**P*<0.001). The V531D mutation abolished this repression. (E-L) Wild-type cuticle pattern (E) was altered by *E22c-Gal4* driven epidermal expression of *UAS-pbl* $\Delta$ BRCT1&2 (F), *UAS-pbl*DH-PH (G), *UAS-pbl* $\Delta$ N-term (H) and *UAS-pbl* $\Delta$ NLS (I), but not of *UAS-pbl*<sup>V531D</sup> (J), *UAS-pbl*DH-PH<sup>V531D</sup> (K) or *UAS-pbl* $\Delta$ N-term<sup>V531D</sup> (L). Denticle belt fusions (arrows in F,G) indicate antagonism of Wg signaling. *UAS-pbl* $\Delta$ N-term (H) and *UAS-pbl* $\Delta$ NLS (I) produced severely fragmented cuticles. Mutating the GEF domain rescued this fragmentation: *E22c*-driven *UAS-pbl* $\Delta$ N-term<sup>V531D</sup> (L) was indistinguishable from wild type. Error bars represent s.e.m.

(data not shown). We also mutated the PEST sequence alone but did not observe any alteration in the repression by Pbl of DROpphase induction by Wg-CM (Fig. 3C).

The C-terminal region of Pbl contains the DH-PH domain, which is crucial for GEF activity (Prokopenko et al., 1999). The *pbl*DH-PH construct consists only of this portion of the molecule, yet was sufficient to mediate Wg repression (Fig. 3C,D), although somewhat less effectively than the full-length protein. To test directly the role of the GEF activity of Pbl in Wg repression, we introduced a point mutation (V531D) in the DH domain. This missense change is known to compromise the catalytic activity of Pbl: it abolished all dominant phenotypes associated with *pbl* $\Delta$ N-term expression (van

Impel et al., 2009). Constructs containing the V531D mutation (*pbl*<sup>V531D</sup>, *pbl* $\Delta$ N-term<sup>V531D</sup>, *pbl*DH-PH<sup>V531D</sup>) were no longer able to repress DROpphase activity or Wg target gene induction by Wg-CM (Fig. 3C,D). Thus, GEF activity is essential for Pbl regulation of Wg signaling.

We next tested the function of these mutated Pbl proteins *in vivo*, using transgenic fly lines to overexpress each construct in the embryonic epidermis with *E22c-Gal4*. Overexpression of *pbl* $\Delta$ BRCT1&2 resulted in 95.7% embryonic lethality with loss of naked cuticle separating the denticle belts in 40.6% (*n*=352) of embryos; *pbl*DH-PH resulted in 57.3% embryonic lethality with loss of naked cuticle separating the denticle belts in 49% (*n*=363) of

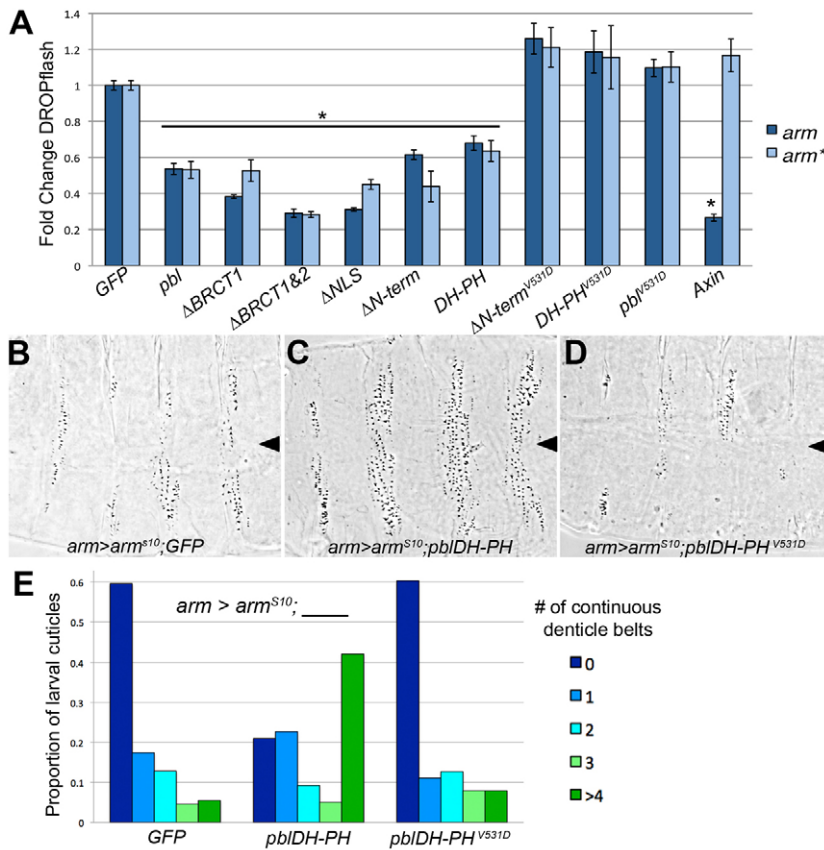

**Fig. 4. Pbl acts downstream of Arm stabilization.** (A) *pbl* repressed induction of DROPflash by *arm* and *arm\** to 53% of control GFP. By contrast, Axin repressed *arm*-induced DROPflash to 26% of GFP control but was unable to repress *arm\**-induced DROPflash, consistent with its destruction complex role. *pbl $\Delta$ BRCT1*, *pbl $\Delta$ BRCT1&2*, *pbl $\Delta$ NLS*, *pbl $\Delta$ N-term* and *pblDH-PH* repressed *arm* and *arm\** induction of DROPflash ( $*P < 0.001$ ), whereas GEF-mutated *pbl $\Delta$ N-term<sup>V531D</sup>*, *pblDH-PH<sup>V531D</sup>* and *pbl<sup>V531D</sup>* did not ( $P > 0.05$ ). (B) In fly embryos, *arm-Gal4* driven expression of the stabilized *UAS-arm<sup>S10</sup>* resulted in excess naked cuticle and few denticle belts. Co-expressing *UAS-GFP* did not alter this cuticle phenotype. Arrowhead indicates position of the ventral midline in B-D. (C) Co-expressing *UAS-pblDH-PH* diminished excess naked cuticle specification and increased the proportion of embryos with partial denticle belts, where denticles were continuous across the ventral midline. (D) Co-expressing *UAS-pblDH-PH<sup>V531D</sup>* did not alter excess naked cuticle specification. (E) Quantification of denticle belt status in larval cuticles ( $n > 100$  for each cross). Cuticles representing the median phenotype for each genotype are shown in B-D. Error bars represent s.e.m.

embryos (Fig. 3F,G; Table 1). These results confirm that Tum binding is not essential for antagonism by Pbl of Wg signaling, and that the DH-PH domain alone is sufficient for this function. Expression of *pbl $\Delta$ BRCT1&2*, like full-length *pbl*, produced other developmental phenotypes, such as missing head structures and defects in germ band retraction and in dorsal closure (note the curvature of embryonic cuticle in Fig. 1D and Fig. 3F, due to dorsal defects). These pleiotropic phenotypes were not observed with *pblDH-PH* overexpression, indicating that they were not related to the role of Pbl in Wg signaling. Instead, these defects may stem from regulatory factors that interact with the C-terminus: this region is present in *pbl $\Delta$ BRCT1&2* but absent in *pblDH-PH*. Lethality and loss of naked cuticle phenotypes observed with full-length *pbl* or *pblDH-PH* were eliminated by introducing the V531D GEF mutation into these constructs (Fig. 3J,K; Table 1). Thus, GEF activity is required for Pbl to antagonize Wg-mediated patterning *in vivo*, just as it is *in vitro*.

Expression of the *pbl $\Delta$ N-term* ( $n=271$ ) or *pbl $\Delta$ NLS* ( $n=529$ ) transgenes resulted in epidermal fragmentation that prevented analysis of cuticle pattern (Fig. 3H,I; Table 1). The forced cytosolic localization of these mutant proteins, which lack the signals for nuclear translocation, may trigger inappropriate Rho1 activation early in development. Consistent with this idea, overexpression of constitutively active *Rho1<sup>V12</sup>* in the epidermis yielded a similar phenotype (data not shown). Again, the dramatic dominant phenotype depended on GEF activity: effects of *pbl $\Delta$ N-term* were completely suppressed when the V531D GEF mutation was introduced (Fig. 3L; Table 1). We did not observe any adverse effect on cell morphology when overexpressing *pbl $\Delta$ N-term* or *pbl $\Delta$ NLS* in cell culture (data not shown). Like the full-length *pbl*, these constructs repressed Wg response in a GEF-dependent fashion

(Fig. 3C,D). Thus, the epidermal fragmentation we observed in embryonic cuticles probably results from disruption of cell-to-cell contacts, which are not essential for cells growing in culture.

#### Pbl functions downstream of Arm and does not act through Arm destabilization

Most negative regulators of the Wg/Wnt pathway are associated with the destruction complex, which controls Arm/beta-cat stability. We expected that Pbl functions at this level as well, because it appeared to modulate Arm accumulation in the embryo. However, when we tested its effects on cells induced by overexpression of *arm* or an artificially stabilized *arm*, we were surprised to find that Pbl can still repress pathway activation. The stabilized form, *arm\**, carries mutations in the Casein kinase 1 $\alpha$  phosphorylation sites; these sites are required to prime subsequent Zw3/GSK phosphorylation and therefore *arm\** protein is resistant to degradation (Yanagawa et al., 2002; Blauwkamp et al., 2008). Wild-type *arm* overexpression induced DROPflash expression in S2R+ cells at levels similar to those induced by Wg-CM, suggesting that this is sufficient to overwhelm destruction complex activity. This reflects another difference between cultured cells and intact embryos: overexpressing wild-type *arm* in embryos does not disrupt pattern (Orsulic and Peifer, 1996), only the stabilized form does so. Overexpressing full-length *pbl* repressed the induction of DROPflash by either *arm* or *arm\** to 53% of control GFP expression ( $P < 0.001$ ; Fig. 4A). As expected, overexpression of Axin, a component of the destruction complex, was able to repress DROPflash induced by *arm* ( $P < 0.001$ ), but not DROPflash induced by the degradation-resistant *arm\** (Fig. 4A). These data indicate that *pbl* functions downstream not only of the Wg receptor complex, but also downstream of Arm stabilization. Furthermore, all of the

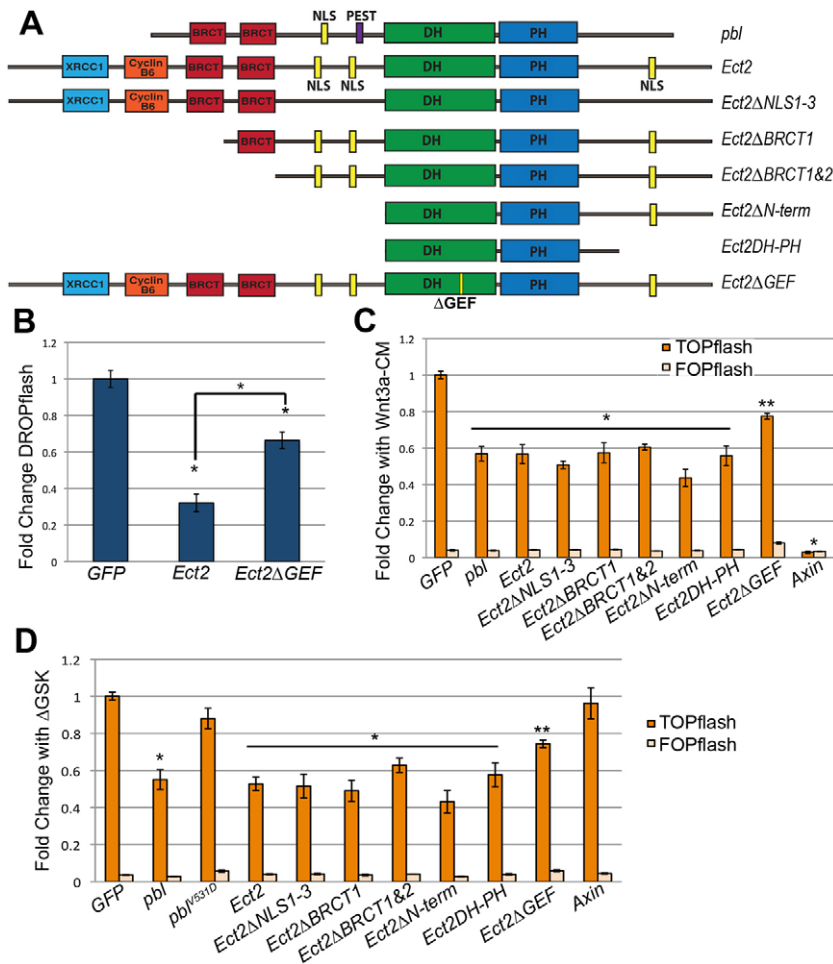

**Fig. 5. ECT2 and Pbl modulate Wnt signaling in HEK293T cells.** (A) ECT2 domains are similar to Pbl, but ECT2 has a longer N-terminus, no PEST sequence, and multiple NLS motifs. The N-terminus contains regions homologous to human XRCC1, a DNA repair enzyme, and yeast Cyclin B6, a cell cycle regulator. *Ect2ΔNLS1,2,&3* mutates all three NLSs. (B) *ECT2* repressed Wg-CM-induced DROppflash to 32% of control GFP in S2R+ cells. Mutating the GEF domain as described by Saito et al. (Saito et al., 2004) diminished this effect to 66% of control GFP ( $*P < 0.001$ ). (C) In human HEK293T cells induced with Wnt3a-CM, *pbl* or *ECT2* reduced TOPflash reporter activity to 57% or 56%, respectively, of control GFP, compared with Axin inhibition to 3% of control GFP. *Ect2ΔBRCT1*, *Ect2ΔBRCT1&2*, *Ect2ΔNLS1,2,&3*, *Ect2ΔN-term* and *Ect2DH-PH* repressed Wnt3a-CM-induced TOPflash to an extent similar to full length *ECT2* ( $*P < 0.001$ ). GEF domain mutations diminished *ECT2* repression to 77% of GFP control ( $**P < 0.05$ ). (D) TOPflash induced in HEK293T cells by transfection with  $\Delta$ GSK *beta-cat* cDNA, was repressed to 55% and 53% of control levels by co-transfecting with *pbl* or *ECT2*, respectively. *Ect2ΔBRCT1*, *Ect2ΔBRCT1&2*, *Ect2ΔNLS1,2,&3*, *Ect2ΔN-term* or *Ect2DH-PH* showed similar repression of  $\Delta$ GSK-induced TOPflash ( $*P < 0.001$ ). GEF mutations in Pbl abolished repression of  $\Delta$ GSK-induced TOPflash whereas analogous GEF mutations in *ECT2* substantially diminished repression ( $**P < 0.05$ ). No changes were observed in FOPflash activity. Error bars represent s.e.m.

mutated forms of Pbl affected *arm*- and *arm\**-induced pathway activation in similar fashion to their effect on Wg-CM induced cells. Expressing *pblΔBRCT1*, *pblΔBRCT1&2*, *pblΔNLS*, *pblΔN-term* and *pblDH-PH* repressed *arm* and *arm\** induction of DROppflash, but constructs bearing the GEF mutation did not show repression (Fig. 4A).

To verify that Pbl functions downstream of Arm stabilization *in vivo*, we overexpressed the *arm*<sup>S10</sup> transgene in the fly embryo. This transgene carries a deletion of phosphorylation sites that results in a stabilized form of *arm*; when ubiquitously expressed in the embryonic epidermis, *arm*<sup>S10</sup> produces excess naked cuticle at the expense of denticles (Pai et al., 1997). We found that co-expressing *arm*<sup>S10</sup> with full-length *pbl* or *pblΔBRCT1&2* produced severe developmental defects, which prevented us from analyzing the cuticle pattern (data not shown). However, co-expressing *arm*<sup>S10</sup> with *pblDH-PH* suppressed the specification of excess naked cuticle, compared with *arm*<sup>S10</sup> co-expressed with the *UAS-GFP* control (Fig. 4B,C,E). Again, this effect requires GEF activity because the GEF-mutated *pblDH-PH*<sup>V531D</sup> construct did not suppress naked cuticle when co-expressed with *arm*<sup>S10</sup> (Fig. 4D,E). These observations are consistent with the idea that *pbl*, like *tum* (Jones et al., 2010), functions downstream of Arm degradation both in *Drosophila* cultured cells and in embryos.

### ECT2 is a negative regulator of Wnt signaling in human HEK293T cells

ECT2, the human homolog of Pbl, has a protein structure similar to Pbl but with a longer N-terminus and with additional NLSs in the

central domain and C-terminus (reviewed by Fields and Justilien, 2010) (Fig. 5A). *ECT2* was first isolated as a cDNA that exhibits transforming activity in cell lines (Miki et al., 1991). Subsequently, it was discovered that the original cDNA encoded an N-terminal deletion that eliminates the BRCT domains and the two N-terminal NLSs (Saito et al., 2004). Eliminating the NLSs alone also resulted in a form of *ECT2* with transforming activity, although the phenotype was not as strong as the longer N-terminal deletion (Saito et al., 2004). Full-length *ECT2* is highly expressed in several human cancers, including those of the brain, lung, bladder, esophagus and pancreas (reviewed by Fields and Justilien, 2010). Because Wnt signaling is misregulated in a variety of cancers, we investigated whether *ECT2*, like Pbl, negatively regulates Wg signaling.

We first expressed human *ECT2* in *Drosophila* S2R+ cells and found that it inhibited the Wg-CM-induced activation of DROppflash by 32% compared with control ( $P < 0.001$ ; Fig. 5B). This effect was diminished, but not completely eliminated, when mutations predicted to disrupt GEF activity (Liu et al., 1998) were introduced (Fig. 5B). Unlike the potent V531D mutation in Pbl, mutating the corresponding conserved V residue and adjacent residues in mammalian DH-PH domain GEFs only partially reduced their GEF activity (Liu et al., 1998). We next tested the effects of both *ECT2* and Pbl on Wnt signaling in mammalian cells. We monitored TOPflash reporter activity in human embryonic kidney 293T (HEK293T) cells. The TOPflash construct carries three copies of Tcf-optimal binding sites that drive luciferase expression in response to Wnt pathway activation, whereas the FOPflash negative control carries mutated copies of the Tcf sites. Expression of either



*Drosophila pbl* or human *ECT2* in HEK293T cells repressed Wnt3a-CM-induced TOPflash activity to 57% and 56%, respectively, of control ( $P < 0.001$ ; Fig. 5C). As expected, neither had any effect on FOPflash (Fig. 5C).

We used the TOPflash system to test each predicted ECT2 functional domain for possible contribution to Wnt regulation. We constructed mutations in ECT2 analogous to those made in Pbl, and expressed *Ect2ΔBRCT1*, *Ect2ΔBRCT1&2*, *Ect2ΔNLS1,2,&3* (in which all NLSs are mutated), *Ect2ΔN-term* and *Ect2DH-PH* in HEK293T cells. All repressed Wnt3a-CM-induced TOPflash activity to a similar degree, with no effect on FOPflash (Fig. 5C). We further found that mutating the GEF domain diminished the ability of ECT2 to repress TOPflash induction (Fig. 5C), just as it did for DROPflash induction in *Drosophila* S2R+ cells (Fig. 5B). Thus, ECT2 probably requires GEF activity to regulate Wnt signaling, consistent with what we had observed for Pbl function in *Drosophila* embryos and cultured cells.

We next tested whether ECT2, like Pbl, acts downstream of beta-catenin stabilization. We induced TOPflash activity using ΔGSK-beta-cat (ΔGSK), a constitutively active form of beta-catenin carrying mutations in the GSK-3beta and Casein Kinase 1alpha phosphorylation sites. We expressed *pbl*, *ECT2*, *Ect2ΔBRCT1*, *Ect2ΔBRCT1&2*, *Ect2ΔNLS1,2,&3*, *Ect2ΔN-term* or *Ect2DH-PH* in HEK293T cells and found that all repressed ΔGSK-induced TOPflash activity (Fig. 5D). The V531D mutation in Pbl, which eliminated the activity of Pbl in S2R+ cells, also eliminated the ability of Pbl to repress ΔGSK-induced TOPflash activity (Fig. 5D). Similarly, mutations to the ECT2 GEF domain partially eliminated ECT2 repression of ΔGSK induction, just as was observed with Wnt3a induction. Thus, ECT2 RhoGEF activity blocks Wnt signal transduction downstream of beta-catenin stabilization, just as Pbl does, indicating that this novel mechanism for modulating Wnt signaling is highly conserved.

#### **Pbl may regulate Wg signaling by modulating the activity of Rho1**

Because GEF activity was crucial to Pbl-mediated Wg regulation, we tested known GTPases to determine which might be responsible for the Pbl effect. Pbl is known to act as an exchange factor for Rho1 during cytokinesis (Prokopenko et al., 1999), and *in vitro* exchange assays using the Pbl DH domain demonstrated that Pbl also has GEF activity towards Rac1 and Rac2 (van Impel et al., 2009). However, as full-length Pbl was not used in these experiments it is possible that Pbl has activity towards other Rho family GTPases as well. Therefore, we examined *Cdc42*, *RhoL* and *Mtl* as well as *Rho1*, *Rac1* and *Rac2* to determine whether any of these GTPases might play a role in Wg regulation. We found that all GTPases tested significantly reduced DROPflash activity ( $P < 0.015$ ) when overexpressed in S2R+ cells, with *Rho1*, *Rac1* and *Rac2* showing the greatest effect (Fig. 6A). This was observed with induction either by Wg-CM (not shown) or by transfection with wild-type *arm* (shown). Pbl co-expression (pink columns) further repressed DROPflash activity ( $P < 0.0015$ ), except in the case of Rho1 ( $P > 0.05$ ). Thus, Rho family GTPase activation in general can interfere with Wg/Wnt signal transduction, but Rho1 appears to be the one through which Pbl acts.

We also co-expressed *pbl* with dominant-negative forms of *Rho1*, *Rac1*, *Rac2*, *Cdc42*, *RhoL* and *Mtl* to test loss-of-function rather than gain-of-function phenotypes. If Pbl influences Wg signaling through Rho1 activation, then one would predict that dominant-negative Rho1 should abrogate the effects of Pbl overexpression. This is exactly what we observed. None of the dominant-negative GTPases

tested interfered with Pbl-mediated Wg/Wnt repression except for dominant-negative Rho1 (Fig. 6B). We next examined *Rho1*<sup>720</sup> mutant embryos and found that in addition to well-characterized defects in head involution and dorsal closure (Strutt et al., 1997; Bloor and Kiehart, 2002; Jacinto et al., 2002), zygotic mutants show excess naked cuticle replacing the ventral denticles (Fig. 6C). Thus, loss of Rho1 function results in patterning defects consistent with hyperactivation of the Wg/Wnt pathway, just as Pbl loss of function does. We propose that the Pbl RhoGEF acts through Rho1 to negatively regulate Wg/Wnt signaling.

#### **DISCUSSION**

We had originally investigated Pbl because of its interaction with the Wnt regulators Tum and Pav during cytokinesis. Our data show that although Pbl does regulate Wnt signaling, it does so independently of Tum and Pav. First, Pbl regulation of Wg signaling does not require the Tum-binding BRCT1 domain. Indeed, some constructs lacking this region were more effective than full-length Pbl in repressing DROPflash. Second, Tum and Pav require nuclear localization to regulate Wg signaling (Jones et al., 2010). By contrast, we found no nuclear role for Pbl or ECT2 in Wg/Wnt regulation. Third, Pbl regulation of Wg/Wnt signaling correlates with its GEF activity, whereas Tum does not require GAP activity to regulate Wg signaling (Jones and Bejsovec, 2005; Jones et al., 2010). Together, these results suggest that although Tum, Pav and Pbl act together in a complex during cytokinesis, they play distinctly different roles in their influence on the Wg/Wnt pathway. Our analysis of Pbl and ECT2 domain requirements further established distinctions between cytokinesis and signaling roles: for example, the BRCT domains of Pbl or ECT2 are essential for cytokinesis (Saito et al., 2003; van Impel et al., 2009) but are not required for Wg/Wnt inhibition (Fig. 3C,D; Fig. 5C,D).

Most negative regulators of Wnt signaling alter Arm/beta-cat stabilization; this is true of Axin, which consistently repressed the pathway more effectively than did Tum, Pav or Pbl. However, we found that Pbl/ECT2 RhoGEF can repress Wg/Wnt activity induced by stabilized forms of Arm/beta-cat (Fig. 4; Fig. 5D), which Axin cannot do (Fig. 4A). Thus Pbl/ECT2 functions downstream of the destruction complex to modulate expression of target genes. Although the mild changes in endogenous Arm stability observed in *pbl* loss- and gain-of-function conditions (Fig. 1E,F; Fig. 2C,D) are consistent with mutant phenotypes, they may instead be a secondary effect of RhoGEF on Arm localization. Our data suggest that Pbl/ECT2 acts on Arm/beta-cat at a point between its stabilization and its translocation into the nucleus. We can imagine several ways in which this could occur (Fig. 6D). First, Wg/Wnt repression could result from a general effect on the actin cytoskeleton. Rho family GTPases regulate formins and other effector molecules that control actin dynamics (Symons and Settleman, 2000; Bustelo et al., 2007). Both Arm/beta-cat and Apc are known to interact with the actin cytoskeleton (Weis and Nelson, 2006; Moseley et al., 2007; Okada et al., 2010) and to assume a cortical localization in polarized epithelial cells (Peifer, 1993; McCartney et al., 1999). Changes in the actin network might alter subcellular localization or activity of Arm. Alternatively, GTPase activation of an effector molecule might have a direct effect on some component of the Wnt pathway or of a parallel signaling pathway that antagonizes Wnt signaling. For instance, Diaphanous, a Rho1 effector, interacts genetically and physically with Apc2 (Webb et al., 2009). All GTPases tested had some capacity to repress Wg/Wnt signaling, raising the possibility that any change in the actin cytoskeleton can negatively influence signaling and/or that multiple effectors are involved. Alternatively,

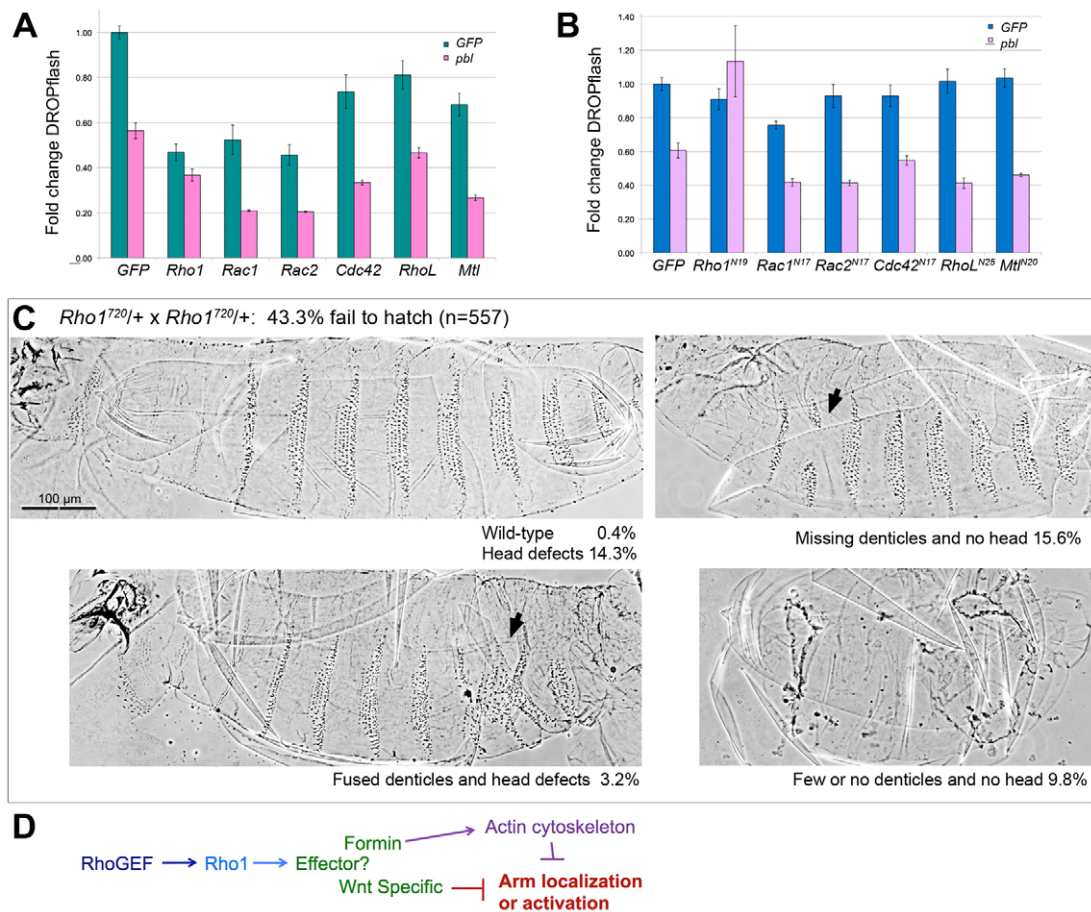

**Fig. 6. Pbl acts through Rho1 to modulate Wg/Wnt signaling.** (A) *arm*-induced DROFlash activity in S2R+ cells was monitored after addition of GFP control DNA (green bars) versus *pbl* DNA (pink bars). All GTPases tested showed some repression compared with GFP alone ( $P < 0.015$ ). Further repression was observed when *pbl* was added ( $P < 0.0015$ ) except in the case of *Rho1* ( $P > 0.05$ ). (B) Dominant-negative GTPases did not diminish Pbl-mediated repression of activity (lavender bars) except for dominant-negative *Rho1* ( $P < 0.01$ ). Only *Rac1*<sup>N17</sup> showed significant repression of DROFlash on its own ( $P < 0.001$ ). (C) *Rho1*<sup>720</sup>, a strong allele, shows some haploinsufficiency when outcrossed away from the CyO balancer. More than 25%, the expected proportion of homozygous embryos, fail to hatch. The proportion of embryos showing the two most severe classes of pattern defects (25.4%; right-hand panels), was consistent with these classes representing *Rho1*<sup>720</sup> homozygotes. These two classes show an excess of naked cuticle at the expense of denticles. Arrows indicate pattern disruptions. (D) Model for how Pbl RhoGEF could influence the Wg/Wnt pathway, either directly through activation of a Wnt-specific effector or indirectly through general alteration of actin cytoskeleton properties. Error bars represent s.e.m.

these GTPases may cross-activate Rho1, and only Rho1 activation mediates the Pbl regulation of Wnt signaling. We are currently exploring these possibilities.

The role of Rho GTPases in planar cell polarity, a non-canonical Wnt signaling pathway, has been well-studied, but growing evidence suggests that Rho GTPases modulate canonical Wnt signaling in mammalian cells. Several GEFs potentiate Wnt signaling by activating Rac1: the GEF DOCK4 promotes beta-cat degradation, whereas the GEF Tiam1 is recruited to Wnt-responsive promoters where it activates Rac1 and promotes transcription (Buongiorno et al., 2008; Upadhyay et al., 2008). Rac1 also appears to be activated by Wnt signaling, leading to activation of JNK2 (MAPK9) kinase and nuclear import of beta-catenin (Wu et al., 2008). By contrast, we found that Pbl antagonizes Wnt signaling through Rho1 activation. Thus, Rho GTPases can have either positive or negative effects on Wnt signaling. The challenge now is to identify the effector molecules with which these G proteins interact in their activated, GTP-bound forms to modulate Wnt pathway output.

Our finding that ECT2 negatively regulates Wnt signaling in human cells suggests that it would be protective against

oncogenesis. Prior work categorizing *ECT2* as a proto-oncogene was based on clones that lacked the N-terminus or nuclear localization signals. Although full-length ECT2 cannot transform cells (Saito et al., 2004), full-length ECT2 is overexpressed in many human tumors (Saito et al., 2003). It is unclear if the upregulation observed in tumors is a cause versus a consequence of oncogenesis; it may simply reflect the essential role of ECT2 in the cell cycle. No upregulation of ECT2 is observed in colorectal cancer, the cancer most strongly associated with aberrations in Wnt signaling (Fields and Justilien, 2010). The full role that ECT2 plays in human tumorigenesis is just beginning to be explored (Justilien and Fields, 2009) and our work demonstrates that any proposed role for ECT2 in cancer must consider its conserved function in inhibiting Wnt signaling.

## MATERIALS AND METHODS

### *Drosophila* stocks, embryo collection, and imaging

All stocks were obtained from the Bloomington Stock Center (Bloomington, IN, USA) except *UAS-pbl*, *UAS-pblΔBRCT* (for clarity referred to in this manuscript as *UAS-pblΔBRCT1&2*), *UAS-pblΔN-term*, *UAS-pblΔN-*



*term<sup>V531D</sup>*, *UAS-pblDH-PH* and *UAS-pblDH-PH<sup>V531D</sup>*, which were a gift from Arno Muller (University of Dundee, UK). *UAS-pbl<sup>V531D</sup>* and *UAS-pblΔNLS* were created by Gateway cloning (Invitrogen). To examine cuticles, eggs were allowed to develop for 24 hours at 25°C, dechorionated and mounted in Hoyer's medium (Wieschaus and Nüsslein-Volhard, 1986). Antibody staining was performed on embryos at developmental stage 9, as described by Chao et al. (Chao et al., 2007). Images were captured with SPOT camera (Diagnostic Instruments, Sterling Heights, MI, USA) on a Zeiss Axioplan microscope, and were processed with SPOT imaging and Adobe Photoshop.

### Plasmids

cDNAs for *pbl*, *Rho1*, *Rac1*, *Rac2*, *Cdc42*, *RhoL* and *Mtl* were obtained from the *Drosophila* Genomics Research Center (DGRC, Bloomington, IN, USA). *ECT2* cDNA is from Open Biosystems (Fisher Scientific). Deletions and mutation of *Pbl* and *ECT2* were made as described previously (van Impel et al., 2009; Saito et al., 2004). The following are not described in the cited papers and encode the following amino acids of Pbl or ECT2 proteins: *pblΔBRCT1* consists of aa 207-853; *pblΔNLS* mutates aa 316, 318, 319 and 320 to alanine; *pblΔPEST* mutates aa 373-377 to alanine; and *Ect2ΔBRCT1* only encodes aa 221-883. *pbl<sup>V531D</sup>*, *pblΔNLS*, *pblΔPEST*, *Ect2ΔGEF* and all dominant-negative *Rho1*, *Rac1*, *Rac2*, *Cdc42*, *RhoL* and *Mtl* were made using site-directed mutagenesis (QuikChange II, Agilent Technologies). *arm* and *arm\** were constructed by PCR amplifying transgenic sequences from the *UAS-armS2* (Orsulic and Peifer, 1996) and *UAS-arm\** (Chang et al., 2008) fly stocks, respectively. For *Drosophila* cell culture, we used the *pAW* vector (DGRC), which drives expression with the *Drosophila Actin 5C* promoter, and for HEK293T cells we used the *pcDNA3.1/nV5-DEST* vector (Invitrogen), which drives expression with the CMV promoter. The *Renilla* luciferase from *phRG-TK* (Promega) was moved into the *pHW* vector (DGRC), driven by *Drosophila hsp70* promoter, to make the *pHW-Renilla* control.

### Cell culture and luciferase assays

S2, S2-tub-wg and S2R+ *Drosophila* cell lines were obtained from the DGRC and grown in Schneiders *Drosophila* media (Gibco/Invitrogen) with 10% fetal bovine serum (FBS) and 1% Antibiotic and Antimycotic (Invitrogen). S2 and S2-tub-wg cells were used to isolate Wg-conditioned media (Wg-CM) as described by Blauwkamp et al. (Blauwkamp et al., 2008). DROPflash assays were performed in S2R+ cells transfected with Eugene HD (Promega), using 20 ng of DROPflash (a gift from K. Cadigan, University of Michigan, Ann Arbor, MI, USA), 0.03 ng of *pHW Renilla* transfection control, 40 ng *pA-GFP*, *arm*, or *arm\** and 40 ng test DNA. Wg-CM and *arm* induce DROPflash to similar levels, *arm\** induction is threefold higher. TOPflash assays were carried out in HEK293T cells transfected with Lipofectamine 2000 (Invitrogen) using 20 ng TOPflash or FOPflash (Upstate/Millipore), 0.05 ng *phRG-TK Renilla* transfection control plasmid (Promega), 50 ng *pc-GFP* or *pc-ΔGSK-beta-cat* and 40 ng test DNA. All TOPflash, FOPflash and DROPflash assays were performed in triplicate with at least two independent experiments for each condition. Expression was monitored within 24 hours using the Dual-Luciferase Reporter Assay System (Promega) on a Veritas luminometer (Promega), and values were divided by the *Renilla* luciferase transfection control. The fold induction was determined by dividing induced by uninduced values. Data were normalized to compare across experiments by setting the average *pA-GFP* or *pc-GFP* values to 1 and normalizing. *P*-values were calculated using Student's *t*-test or an ANOVA with Bonferroni post-test to compare *pA-GFP* or *pc-GFP* to all and *pA-pbl* or *pc-Ect2* to all. Error bars in all graphs are s.e.m.

### Quantitative real time-PCR and RNA interference

RT-PCR assays were carried out using S2R+ cells transfected with 750 ng *pA-IL2Ra* control and 1750 ng test DNA. *nkd*, *CG6234* and *beta-tubulin* primers were the same as those used by Fang et al. (Fang et al., 2006). Transfected cells were isolated from non-transfected cells using Dynabeads (Invitrogen) 5 hours after addition of conditioned media [as described by Blauwkamp et al. (Blauwkamp et al., 2008)], RNA was harvested using an RNeasy mini kit with DNase digestion (Qiagen), and cDNA was made using

Superscript II kit (Invitrogen). Gene expression was analyzed using SYBR green (Bio-Rad) on a Mastercycler realplex<sup>2</sup> (Eppendorf). Samples were run in duplicate and fold induction represents averages from over three experiments, normalized to *beta-tubulin* expression. To compare across experiments, data were normalized by setting average fold induction of *pA-GFP* to 1.

RNAi experiments were performed as outlined by the *Drosophila* RNAi Screening Center (<http://www.flyrnai.org/DRSC-PRS.html>) except that two rounds of RNAi treatment were performed. Primers used for *pbl* RNAi were: TAATACGACTCACTATAGGGGAGATCAAGACGATCTTTGGC (forward) and TAATACGACTCACTATAGGGGTGTTGAATCCTT-TAGAACGCC (reverse). Double-stranded RNA was synthesized using the MEGAscript T7 kit (Invitrogen).

### Acknowledgements

We are grateful to Arno Müller for encouragement and for providing transgenic *pbl* fly stocks. We thank K. Cadigan for the DROPflash reporter, E. Verheyen for *UAS-arm\** flies, J. Wang for technical assistance, and lab members for comments on the manuscript. We also thank FlyBase for essential information and the Bloomington Stock Center and *Drosophila* Genomics Resource Center for reagents.

### Competing interests

The authors declare no competing financial interests.

### Author contributions

All three authors designed and performed the research, analyzed data and contributed to writing the manuscript.

### Funding

This work was supported by a National Institutes of Health grant [R01 GM86620 to A.B.]. Deposited in PMC for release after 12 months.

### References

- Adams, R. R., Tavares, A. A., Salzberg, A., Bellen, H. J. and Glover, D. M. (1998). pavarotti encodes a kinesin-like protein required to organize the central spindle and contractile ring for cytokinesis. *Genes Dev.* **12**, 1483-1494.
- Bejsovec, A. (2006). Flying at the head of the pack: Wnt biology in *Drosophila*. *Oncogene* **25**, 7442-7449.
- Blauwkamp, T. A., Chang, M. V. and Cadigan, K. M. (2008). Novel TCF-binding sites specify transcriptional repression by Wnt signalling. *EMBO J.* **27**, 1436-1446.
- Bloor, J. W. and Kiehart, D. P. (2002). *Drosophila* RhoA regulates the cytoskeleton and cell-cell adhesion in the developing epidermis. *Development* **129**, 3173-3183.
- Buongiorno, P., Pethe, V. V., Charames, G. S., Esufali, S. and Bapat, B. (2008). Rac1 GTPase and the Rac1 exchange factor Tiam1 associate with Wnt-responsive promoters to enhance beta-catenin/TCF-dependent transcription in colorectal cancer cells. *Mol. Cancer* **7**, 73.
- Bustelo, X. R., Sauzeau, V. and Berenjano, I. M. (2007). GTP-binding proteins of the Rho/Rac family: regulation, effectors and functions in vivo. *Bioessays* **29**, 356-370.
- Chang, M. V., Chang, J. L., Gangopadhyay, A., Shearer, A. and Cadigan, K. M. (2008). Activation of wingless targets requires bipartite recognition of DNA by TCF. *Curr. Biol.* **18**, 1877-1881.
- Chao, A. T., Jones, W. M. and Bejsovec, A. (2007). The HMG-box transcription factor SoxNeuro acts with Tcf to control Wg/Wnt signaling activity. *Development* **134**, 989-997.
- Clevers, H. (2006). Wnt/beta-catenin signaling in development and disease. *Cell* **127**, 469-480.
- Fang, M., Li, J., Blauwkamp, T., Bhambhani, C., Campbell, N. and Cadigan, K. M. (2006). C-terminal-binding protein directly activates and represses Wnt transcriptional targets in *Drosophila*. *EMBO J.* **25**, 2735-2745.
- Fields, A. P. and Justilien, V. (2010). The guanine nucleotide exchange factor (GEF) Ect2 is an oncogene in human cancer. *Adv. Enzyme Regul.* **50**, 190-200.
- Greaves, S., Sanson, B., White, P. and Vincent, J. P. (1999). A screen for identifying genes interacting with armadillo, the *Drosophila* homolog of beta-catenin. *Genetics* **153**, 1753-1766.
- Hirata, D., Yamabuki, T., Miki, D., Ito, T., Tsuchiya, E., Fujita, M., Hosokawa, M., Chayama, K., Nakamura, Y. and Daigo, Y. (2009). Involvement of epithelial cell transforming sequence-2 oncoantigen in lung and esophageal cancer progression. *Clin. Cancer Res.* **15**, 256-266.
- Jacinto, A., Wood, W., Woolner, S., Hiley, C., Turner, L., Wilson, C., Martinez-Arias, A. and Martin, P. (2002). Dynamic analysis of actin cable function during *Drosophila* dorsal closure. *Curr. Biol.* **12**, 1245-1250.
- Jones, W. M. and Bejsovec, A. (2005). RacGap50C negatively regulates Wingless pathway activity during *Drosophila* embryonic development. *Genetics* **169**, 2075-2086.
- Jones, W. M., Chao, A. T., Zavortink, M., Saint, R. and Bejsovec, A. (2010). Cytokinesis proteins Tum and Pav have a nuclear role in Wnt regulation. *J. Cell Sci.* **123**, 2179-2189.

- Jürgens, G., Wieschaus, E., Nüsslein-Volhard, C. and Kluding, H. (1984). Mutations affecting the pattern of the larval cuticle in *Drosophila melanogaster*: II. Zygotic loci on the third chromosome. *Roux's Arch. Dev. Biol.* **193**, 283-295.
- Justilien, V. and Fields, A. P. (2009). Ect2 links the PKC $\alpha$ -Par6 $\alpha$  complex to Rac1 activation and cellular transformation. *Oncogene* **28**, 3597-3607.
- Li, J., Sutter, C., Parker, D. S., Blauwkamp, T., Fang, M. and Cadigan, K. M. (2007). CBP/p300 are bimodal regulators of Wnt signaling. *EMBO J.* **26**, 2284-2294.
- Liu, X., Wang, H., Eberstadt, M., Schnuchel, A., Olejniczak, E. T., Meadows, R. P., Schkeryantz, J. M., Janowick, D. A., Harlan, J. E., Harris, E. A. et al. (1998). NMR structure and mutagenesis of the N-terminal Dbl homology domain of the nucleotide exchange factor Trio. *Cell* **95**, 269-277.
- MacDonald, B. T., Tamai, K. and He, X. (2009). Wnt/ $\beta$ -catenin signaling: components, mechanisms, and diseases. *Dev. Cell* **17**, 9-26.
- McCartney, B. M., Dierick, H. A., Kirkpatrick, C., Moline, M. M., Baas, A., Peifer, M. and Bejsovec, A. (1999). *Drosophila* APC2 is a cytoskeletally-associated protein that regulates Wingless signaling in the embryonic epidermis. *J. Cell Biol.* **146**, 1303-1318.
- Miki, T., Fleming, T. P., Bottaro, D. P., Rubin, J. S., Ron, D. and Aaronson, S. A. (1991). Expression cDNA cloning of the KGF receptor by creation of a transforming autocrine loop. *Science* **251**, 72-75.
- Miki, T., Smith, C. L., Long, J. E., Eva, A. and Fleming, T. P. (1993). Oncogene ect2 is related to regulators of small GTP-binding proteins. *Nature* **362**, 462-465.
- Moseley, J. B., Bartolini, F., Okada, K., Wen, Y., Gundersen, G. G. and Goode, B. L. (2007). Regulated binding of adenomatous polyposis coli protein to actin. *J. Biol. Chem.* **282**, 12661-12668.
- Noordermeer, J., Johnston, P., Rijsewijk, F., Nusse, R. and Lawrence, P. A. (1992). The consequences of ubiquitous expression of the wingless gene in the *Drosophila* embryo. *Development* **116**, 711-719.
- Nüsslein-Volhard, C., Wieschaus, E. and Kluding, H. (1984). Mutations affecting the pattern of the larval cuticle in *Drosophila melanogaster*: I. Zygotic loci on the second chromosome. *Roux's Arch. Dev. Biol.* **193**, 267-282.
- Nüsslein-Volhard, C., Kluding, H. and Jürgens, G. (1985). Genes affecting the segmental subdivision of the *Drosophila* embryo. *Cold Spring Harb. Symp. Quant. Biol.* **50**, 145-154.
- Okada, K., Bartolini, F., Deaconescu, A. M., Moseley, J. B., Dogic, Z., Grigorieff, N., Gundersen, G. G. and Goode, B. L. (2010). Adenomatous polyposis coli protein nucleates actin assembly and synergizes with the formin mDia1. *J. Cell Biol.* **189**, 1087-1096.
- Orsulic, S. and Peifer, M. (1996). An in vivo structure-function study of Armadillo, the  $\beta$ -catenin homologue, reveals both separate and overlapping regions of the protein required for cell adhesion and for Wingless signaling. *J. Cell Biol.* **134**, 1283-1300.
- Pai, L. M., Orsulic, S., Bejsovec, A. and Peifer, M. (1997). Negative regulation of Armadillo, a Wingless effector in *Drosophila*. *Development* **124**, 2255-2266.
- Peifer, M. (1993). The product of the *Drosophila* segment polarity gene Armadillo is part of a multi-protein complex resembling the vertebrate adherens junction. *J. Cell Sci.* **105**, 993-1000.
- Polakis, P. (2007). The many ways of Wnt in cancer. *Curr. Opin. Genet. Dev.* **17**, 45-51.
- Prokopenko, S. N., Brumby, A., O'Keefe, L., Prior, L., He, Y., Saint, R. and Bellen, H. J. (1999). A putative exchange factor for Rho1 GTPase is required for initiation of cytokinesis in *Drosophila*. *Genes Dev.* **13**, 2301-2314.
- Saito, S., Tatsumoto, T., Lorenzi, M. V., Chedid, M., Kapoor, V., Sakata, H., Rubin, J. and Miki, T. (2003). Rho exchange factor ECT2 is induced by growth factors and regulates cytokinesis through the N-terminal cell cycle regulator-related domains. *J. Cell. Biochem.* **90**, 819-836.
- Saito, S., Liu, X. F., Kamijo, K., Raziuddin, R., Tatsumoto, T., Okamoto, I., Chen, X., Lee, C. C., Lorenzi, M. V., Ohara, N. et al. (2004). Deregulation and mislocalization of the cytokinesis regulator ECT2 activate the Rho signaling pathways leading to malignant transformation. *J. Biol. Chem.* **279**, 7169-7179.
- Schumacher, S., Gryzik, T., Tannebaum, S. and Müller, H. A. (2004). The RhoGEF Pebble is required for cell shape changes during cell migration triggered by the *Drosophila* FGF receptor Heartless. *Development* **131**, 2631-2640.
- Smallhorn, M., Murray, M. J. and Saint, R. (2004). The epithelial-mesenchymal transition of the *Drosophila* mesoderm requires the Rho GTP exchange factor Pebble. *Development* **131**, 2641-2651.
- Somers, W. G. and Saint, R. (2003). A RhoGEF and Rho family GTPase-activating protein complex links the contractile ring to cortical microtubules at the onset of cytokinesis. *Dev. Cell* **4**, 29-39.
- Strutt, D. I., Weber, U. and Mlodzik, M. (1997). The role of RhoA in tissue polarity and Frizzled signalling. *Nature* **387**, 292-295.
- Symons, M. and Settleman, J. (2000). Rho family GTPases: more than simple switches. *Trends Cell Biol.* **10**, 415-419.
- Tatsumoto, T., Xie, X., Blumenthal, R., Okamoto, I. and Miki, T. (1999). Human ECT2 is an exchange factor for Rho GTPases, phosphorylated in G2/M phases, and involved in cytokinesis. *J. Cell Biol.* **147**, 921-928.
- Upadhyay, G., Goessling, W., North, T. E., Xavier, R., Zon, L. I. and Yajnik, V. (2008). Molecular association between  $\beta$ -catenin degradation complex and Rac guanine exchange factor DOCK4 is essential for Wnt/ $\beta$ -catenin signaling. *Oncogene* **27**, 5845-5855.
- van Impel, A., Schumacher, S., Draga, M., Herz, H. M., Grosshans, J. and Müller, H. A. (2009). Regulation of the Rac GTPase pathway by the multifunctional Rho GEF Pebble is essential for mesoderm migration in the *Drosophila* gastrula. *Development* **136**, 813-822.
- Webb, R. L., Zhou, M. N. and McCartney, B. M. (2009). A novel role for an APC2-Diaphanous complex in regulating actin organization in *Drosophila*. *Development* **136**, 1283-1293.
- Weis, W. I. and Nelson, W. J. (2006). Re-solving the cadherin-catenin-actin conundrum. *J. Biol. Chem.* **281**, 35593-35597.
- Wieschaus, E. and Nüsslein-Volhard, C. (1986). Looking at embryos. In *Drosophila, A Practical Approach* (ed. D. B. Roberts). Oxford, England: IRL Press.
- Wu, X., Tu, X., Joeng, K. S., Hilton, M. J., Williams, D. A. and Long, F. (2008). Rac1 activation controls nuclear localization of  $\beta$ -catenin during canonical Wnt signaling. *Cell* **133**, 340-353.
- Yanagawa, S., Lee, J. S. and Ishimoto, A. (1998). Identification and characterization of a novel line of *Drosophila* Schneider S2 cells that respond to wingless signaling. *J. Biol. Chem.* **273**, 32353-32359.
- Yanagawa, S., Matsuda, Y., Lee, J. S., Matsubayashi, H., Sese, S., Kadowaki, T. and Ishimoto, A. (2002). Casein kinase I phosphorylates the Armadillo protein and induces its degradation in *Drosophila*. *EMBO J.* **21**, 1733-1742.
- Zavortink, M., Contreras, N., Addy, T., Bejsovec, A. and Saint, R. (2005). Tum/RacGAP50C provides a critical link between anaphase microtubules and the assembly of the contractile ring in *Drosophila melanogaster*. *J. Cell Sci.* **118**, 5381-5392.
